# Supplementary material for: Sulfonyl hydrazine-functionalized polymer as a specific capturer of reducing glycans from complex samples for high-throughput analysis by electrospray ionization mass spectrometry
Source: Royal Society of Chemistry journal article supplement (doi:10.1039/c3an00931a), 2013-01-01
Supplement: c3an00931a.pdf [file c3an00931a.pdf]

## *Supporting information*

### **Sulfonyl hydrazine-functionalized polymer as a specific capturer of reducing glycans from complex samples for high-throughput analysis by electrospray ionization mass spectrometry**

Chengjian Wang, Jiangbei Yuan, Xiaohua Li, Zhongfu Wang\* and Linjuan Huang\*

Educational Ministry Key Laboratory of Resource Biology and Biotechnology in Western China, College of Life Science, Northwest University, Xi'an 710069, China.

\* To whom correspondence should be addressed. E-mail: wangzhf@nwu.edu.cn (Zhongfu Wang); huanglj@nwu.edu.cn (Linjuan Huang). Tel: +86 29 88305853. Fax: +86 29 88303534.

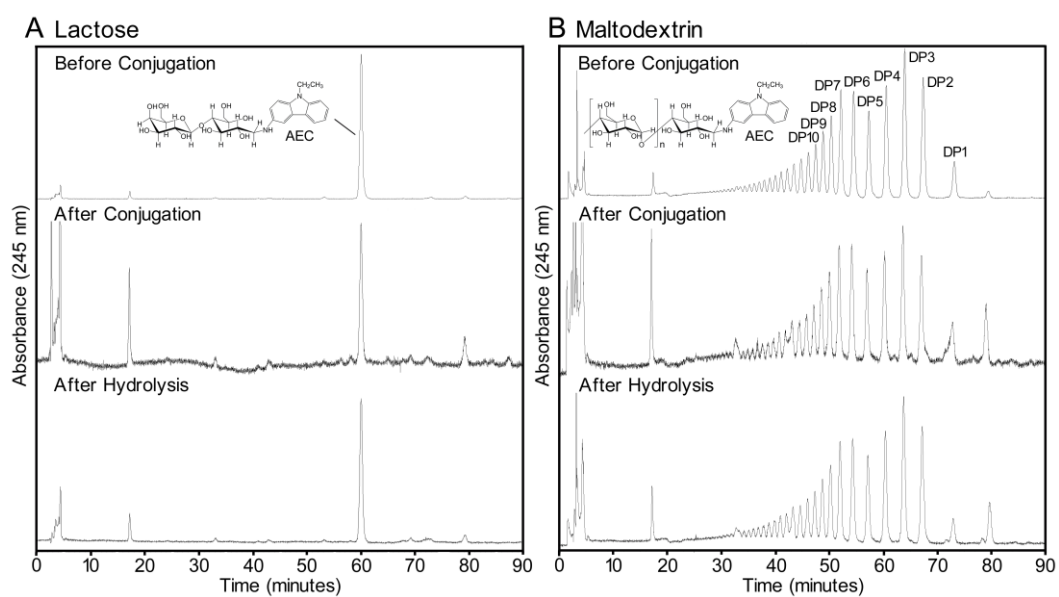

**Fig. S1** RP-HPLC chromatograms of AEC derivatives of lactose (A) and maltodextrin (B) obtained using the SHPS-based glycan capturing procedure. Each sample was analyzed before and after the conjugation reaction as well as after the hydrolytic release reaction.

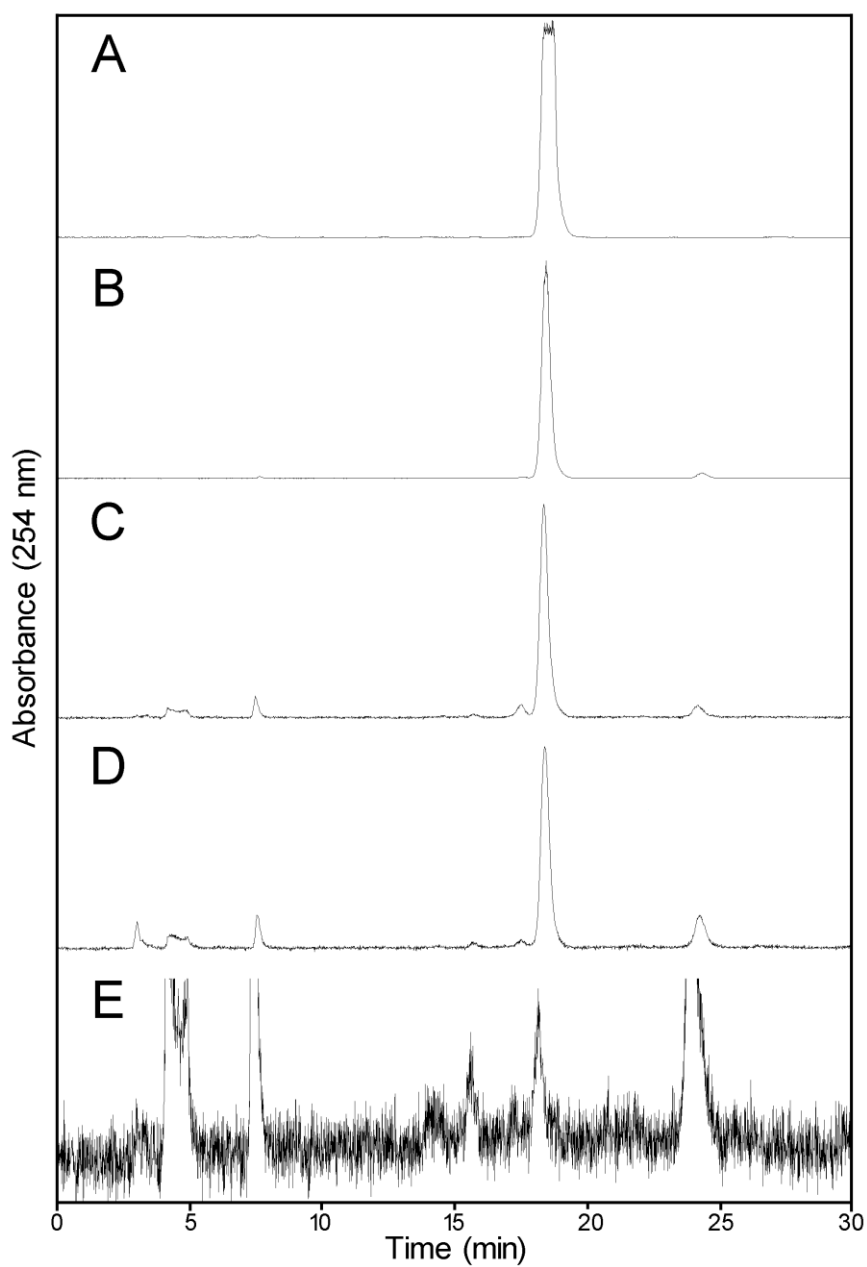

**Fig. S2** RP-HPLC chromatograms of AEC derivatives of lactose obtained using different functional materials, including SHPS beads (B), hydrazide resin (C), hydrazide magnetic beads (D) and aminoethyl resin (E), under the reaction conditions developed merely on the basis of SHPS beads. (A) is the RP-HPLC chromatogram of the AEC derivative of lactose before the conjugation reaction.

### A Ribonuclease B *N*-glycans before SHPS-capture

SHPS recovery RiboB\_130612162702 #100-255 RT: 0.38-0.96 AV: 156 NL: 7.63E3  
T: ITMS + p ESI Full ms [50.00-2000.00]

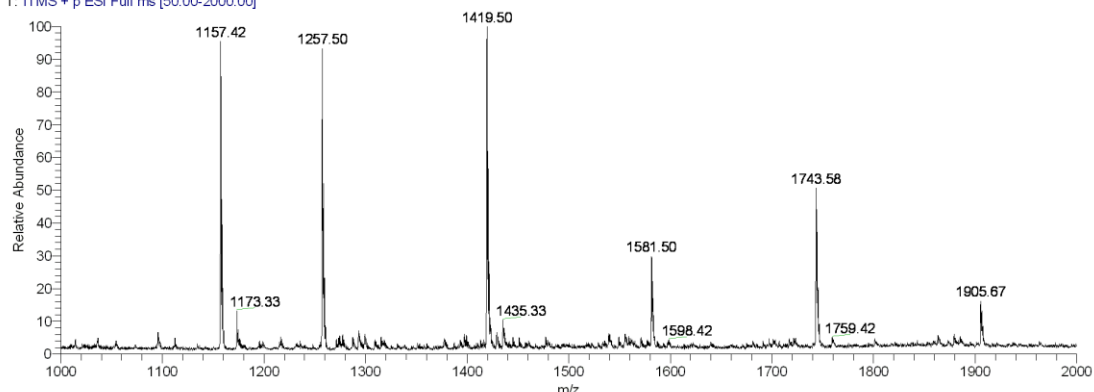

### B Ribonuclease B *N*-glycans after SHPS-capture

SHPS recovery RiboB\_130612162702 #587-751 RT: 2.24-2.86 AV: 165 NL: 1.04E4  
T: ITMS + p ESI Full ms [50.00-2000.00]

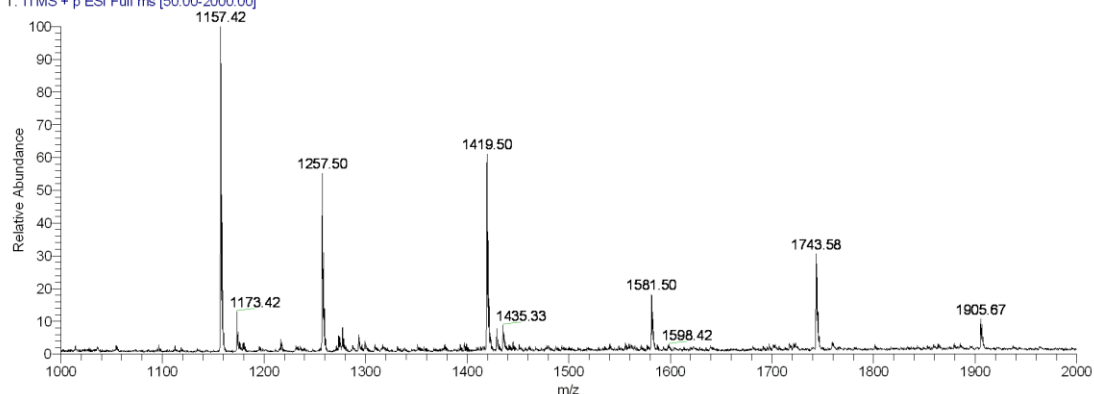

**Fig. S3** Recovery of the SHPS-based glycan capturing procedure tested on ribonuclease B *N*-glycans. (A) ESI-MS profile of the ribonuclease B *N*-glycans purified using graphitized carbon SPE columns used as a control. (B) ESI-MS profile of ribonuclease B *N*-glycans purified using graphitized carbon SPE columns and continuously processed by the SHPS-based procedure. The mass peak with an  $m/z$  value of 1157.42 is assigned to  $\beta$ -cyclodextrin, which is used as an internal standard for the calculation of glycan recovery. The other mass peaks are assigned to the typical *N*-glycans of ribonuclease B.

**Table S1** The reproducibility of the SHPS-based glycan capturing procedure investigated by the analysis of maltodextrin (n=3)

| Glycan <sup>a</sup> | Sample1 | Sample2 | Sample3 | Average   | SD value | CV (%) |
|---------------------|---------|---------|---------|-----------|----------|--------|
| DP1                 | 1289273 | 1401622 | 1301895 | 1330930   | 61545.5  | 4.6    |
| DP2                 | 4003057 | 3925321 | 4014050 | 3980809.3 | 48367.6  | 1.2    |
| DP3                 | 4838611 | 4877151 | 4930139 | 4881967   | 45953.7  | 0.9    |
| DP4                 | 3721440 | 3729419 | 3844194 | 3765017.7 | 68684.7  | 1.8    |
| DP5                 | 2985179 | 2993152 | 2954829 | 2977720   | 20221.0  | 0.7    |
| DP6                 | 3556423 | 3649201 | 3592938 | 3599520.7 | 46738.0  | 1.3    |
| DP7                 | 3325155 | 3444840 | 3329744 | 3366579.7 | 67814.3  | 2.0    |
| DP8                 | 2268926 | 2417842 | 2317561 | 2334776.3 | 75936.0  | 3.3    |
| DP9                 | 1675735 | 1772021 | 1705758 | 1717838   | 49266.6  | 2.9    |
| DP10                | 1258954 | 1284186 | 1308901 | 1284013.7 | 24973.9  | 1.9    |

<sup>a</sup> DP, degree of polymerization.
